# Supplementary material for: Boosting with adjuvanted SCB-2019 elicits superior Fcγ-receptor engagement driven by IgG3 to SARS-CoV-2 spike
Source: PubMed Central journal article supplement (PMC10770118; doi:10.1038/s41541-023-00791-y), 2024-01-05
Supplement: 41541_2023_791_MOESM1_ESM.pdf [file 41541_2023_791_MOESM1_ESM.pdf]

**Supplementary Table 1**

| <b>REAGENT or RESOURCE</b>                      | <b>SOURCE</b>          | <b>IDENTIFIER</b>                                                                                        |
|-------------------------------------------------|------------------------|----------------------------------------------------------------------------------------------------------|
| Anti-Human IgG1-PE                              | Southern Biotech       | 9054-09                                                                                                  |
| Anti-human IgG2-PE                              | Southern Biotech       | 9070-09                                                                                                  |
| Anti-human IgG3-PE                              | Southern Biotech       | 9210-09                                                                                                  |
| Anti-human IgG4-PE                              | Southern Biotech       | 9200-09                                                                                                  |
| Anti-human IgM-PE                               | Southern Biotech       | 9020-09                                                                                                  |
| Anti-human IgA1-PE                              | Southern Biotech       | 9130-09                                                                                                  |
| SARS-CoV-2 WT Spike                             | Sino Biological        | 40589-V08H4                                                                                              |
| SARS-CoV-2 WT S1                                | Sino Biological        | 40591-V08H                                                                                               |
| SARS-CoV-2 WT RBD                               | Sino Biological        | 40592-V08H                                                                                               |
| SARS-CoV-2 WT S2                                | Sino Biological        | 40590-V08B                                                                                               |
| SARS-CoV-2 WT NTD                               | Sino Biological        | 40591-V49H                                                                                               |
| SARS-CoV-2 Beta Spike                           | Sino Biological        | 40589-V08B7                                                                                              |
| SARS-CoV-2 Beta RBD                             | Sino Biological        | 40592-V08H59                                                                                             |
| SARS-CoV-2 Gamma Spike                          | Sino Biological        | 40589-V08B10                                                                                             |
| SARS-CoV-2 Gamma RBD                            | Sino Biological        | 40592-V08H86                                                                                             |
| SARS-CoV-2 Delta Spike                          | Sino Biological        | 40589-V08B16                                                                                             |
| SARS-CoV-2 Delta RBD                            | Sino Biological        | 40592-V08H115                                                                                            |
| SARS-CoV-2 Omicron BA.1 Spike                   | Sino Biological        | 40589-V08H26                                                                                             |
| SARS-CoV-2 Omicron BA.1 RBD                     | Sino Biological        | 40592-V08H121                                                                                            |
| SARS-CoV-2 Omicron BA.1 NTD                     | Sino Biological        | 40591-V08H42                                                                                             |
| SARS-CoV-2 Omicron BA.2 Spike                   | Sino Biological        | 40589-V08H28                                                                                             |
| SARS-CoV-2 Omicron BA.2 RBD                     | Sino Biological        | 40592-V08H123                                                                                            |
| SARS-CoV-2 Omicron BA.2 NTD                     | Sino Biological        | 40591-V08H44                                                                                             |
| SARS-CoV-2 Omicron BA.4/5 Spike                 | Sino Biological        | 40589-V08H32                                                                                             |
| SARS-CoV-2 Omicron BM.1.1 Spike                 | Sino Biological        | 40589-V08H43                                                                                             |
| SARS-CoV-2 Omicron BQ.1.1 Spike                 | Sino Biological        | 40589-V08H41                                                                                             |
| SARS-CoV-2 Omicron CH.1.1 Spike                 | Sino Biological        | 40589-V08H46                                                                                             |
| SARS-CoV-2 Omicron Xbb.1.5 Spike                | Sino Biological        | 40589-V08H45                                                                                             |
| SARS-CoV-2 Omicron XBB.1.16 Spike               | Sino Biological        | 40589-V08H48                                                                                             |
| Ebola Virus Glycoprotein                        | IBT Bioservices        | 0501-015                                                                                                 |
| Influenza HA                                    | Sino Biological        | 11687-V08H                                                                                               |
| SCB-2019                                        | IDOR                   | Custom                                                                                                   |
| PE-Streptavidin                                 | Agilent Technologies   | PB32-10                                                                                                  |
| NHS-Sulfo-LC-LC Kit                             | ThermoFisher           | 21435                                                                                                    |
| Zebra-Spin Desalting and Chromatography Columns | ThermoFisher           | 89882                                                                                                    |
| R Studio V 1.4.1103                             | RStudio, PBC           | Open Source                                                                                              |
| GraphPad Prism                                  | GraphPad Software, LLC | Ragon Site License                                                                                       |
| FlowJo V. 10.8                                  | FlowJo, LLC            | <a href="http://www.flowjo.com/solutions/flowjo/downloads">www.flowjo.com/solutions/flowjo/downloads</a> |
| iQue Forecyt                                    | Sartorius              | 60028                                                                                                    |
| iQue Screener Plus                              | Intellicyt/Sartorius   | 11811                                                                                                    |
| 384-well HydroSpeed Plate Washer                | Tecan                  | 30190112                                                                                                 |

---

|                                            |              |                                        |
|--------------------------------------------|--------------|----------------------------------------|
| MagPlex Microspheres                       | Luminex MFG  | MC12001-01<br>(Cataloged by<br>region) |
| Green Fluorescent Neutravidin Microspheres | ThermoFisher | F8776                                  |
| Red Fluorescent Neutravidin Microspheres   | ThermoFisher | F8775                                  |

---

**Supplementary Table 1. List of reagents, resources, and equipment used in this study**

## Supplementary Figure 1

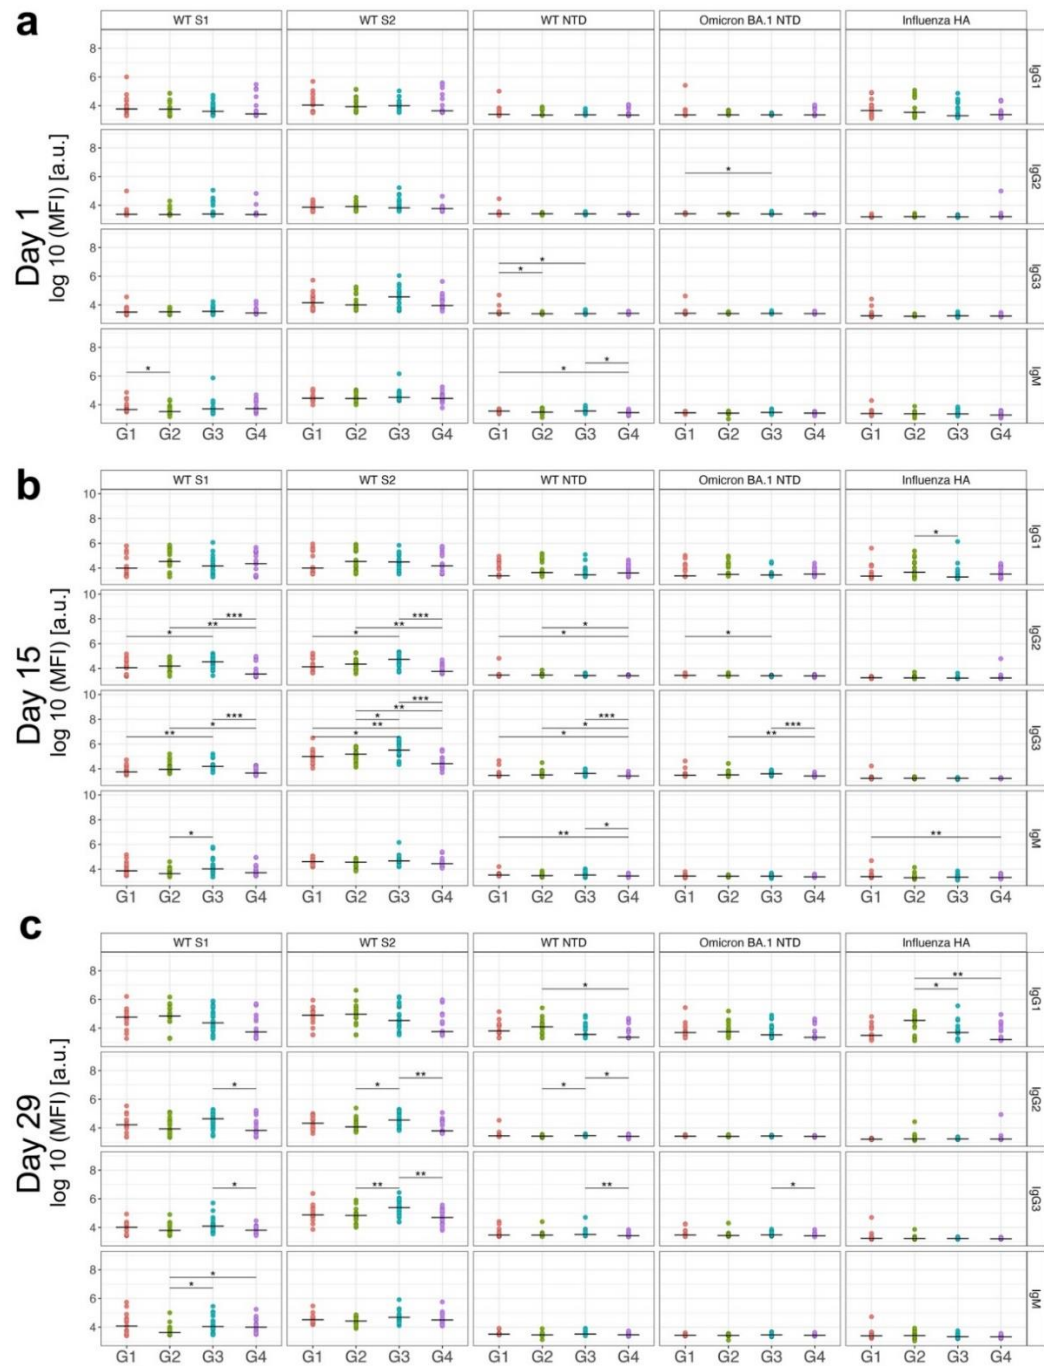

**Supplementary Figure 1. Univariate differences in antibody binding titers among treatment groups for Spike subdomains.** (a) Baseline antibody binding profiles against the indicated antigen of Groups 1, 2, 3, and 4. Shown on the y-axis is the binding mean fluorescence intensity (MFI) in log base 10 of the indicated antibody isotype or subclass. (b) Same as (a), but for antibody binding profiles at Day 15. (c) Same as (a), but for antibody binding profiles at Day 29. \*  $p < 0.05$ , \*\*  $p < 0.01$  \*\*\* $p < 0.001$  before multiple test correction (Wilcoxon rank-sum test). Groups 1, 2, 3, and 4 refer to treatment arms of 9  $\mu\text{g}$  of SCB-2019 + Alum, 9  $\mu\text{g}$  of SCB-2019 + Alum + CpG, 30  $\mu\text{g}$  of SCB-2019 + Alum + CpG, and ChAdOx-1, respectively (see methods). a.u.: arbitrary unit.

## Supplementary Figure 2

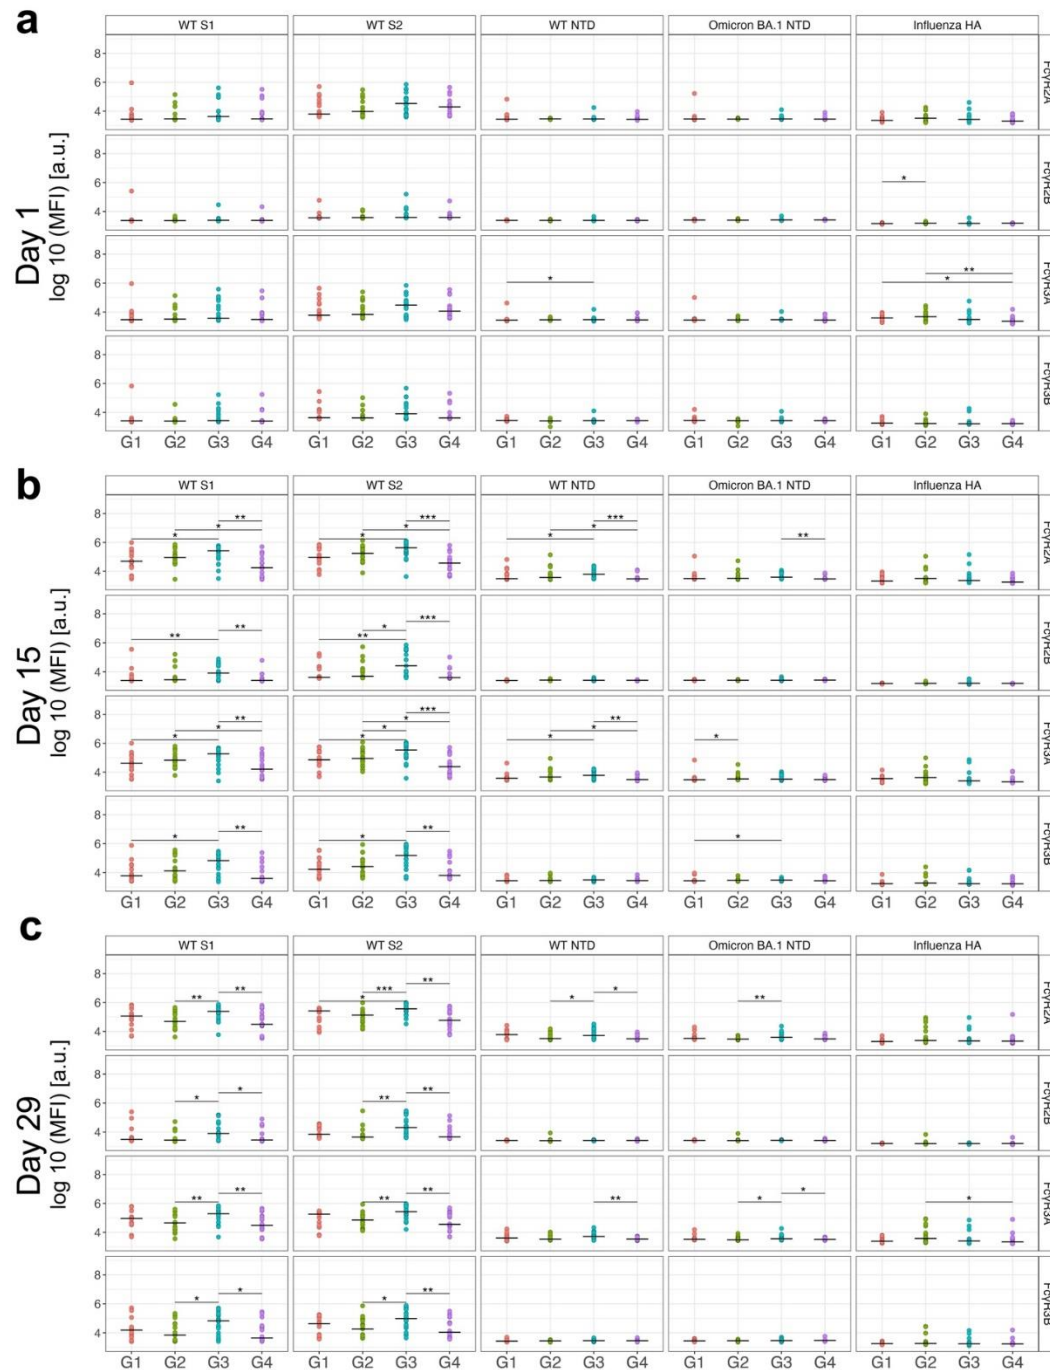

**Supplementary Figure 2. Univariate differences in Fc $\gamma$ R binding antibody titers among treatment groups for Spike subdomains.** (a) Baseline Fc $\gamma$ R binding profiles against the indicated antigen of Groups 1, 2, 3, and 4. Shown on the y-axis is the binding mean fluorescence intensity (MFI) in log base 10 of the indicated Fc $\gamma$ R. (b) Same as (a), but for Fc $\gamma$ R binding profiles at Day 15. (c) Same as (a), but for Fc $\gamma$ R binding profiles at Day 29. \*  $p < 0.05$ , \*\*  $p < 0.01$ , \*\*\*  $p < 0.001$  before multiple test correction (Wilcoxon rank-sum test). Groups 1, 2, 3, and 4 refer to treatment arms of 9  $\mu$ g of SCB-2019 + Alum, 9  $\mu$ g of SCB-2019 + Alum + CpG, 30  $\mu$ g of SCB-2019 + Alum + CpG, and ChAdOx-1, respectively (see methods). a.u.: arbitrary unit.

### Supplementary Figure 3

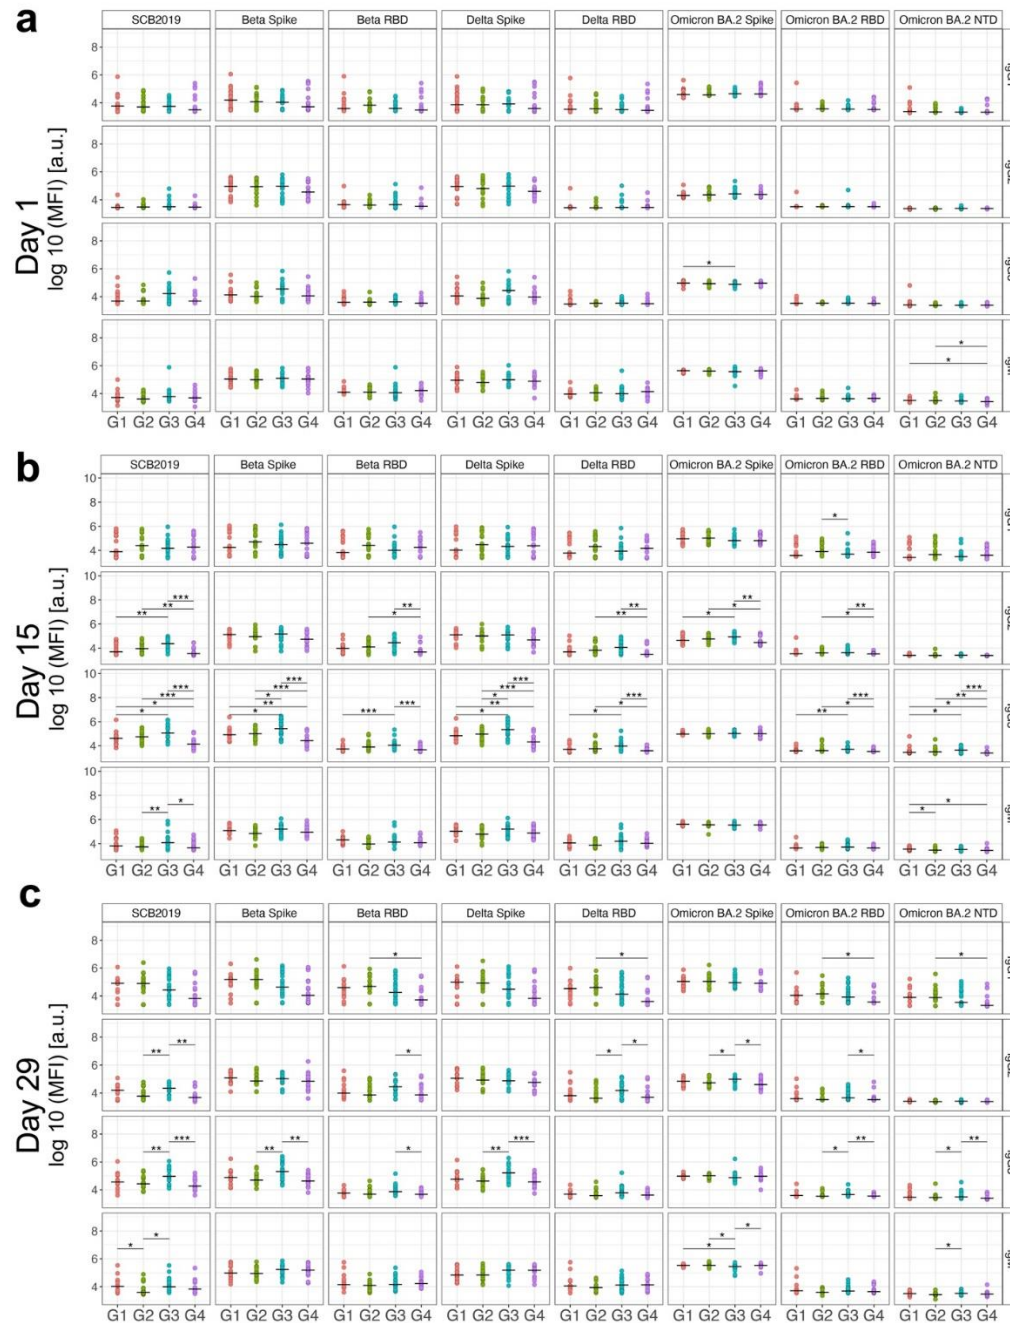

**Supplementary Figure 3. Univariate differences in antibody binding titers among treatment groups for VOC Spikes, subdomains, and SCB-2019.** (a) Baseline antibody binding profiles against the indicated antigen of Groups 1, 2, 3, and 4. Shown on the y-axis is the binding mean fluorescence intensity (MFI) in log base 10 of the indicated antibody isotype or subclass. (b) Same as (a), but for antibody binding profiles at Day 15. (c) Same as (a), but for antibody binding profiles at Day 29. \*  $p < 0.05$ , \*\*  $p < 0.01$ , \*\*\*  $p < 0.001$  before multiple test correction (Wilcoxon rank-sum test). Groups 1, 2, 3, and 4 refer to treatment arms of 9  $\mu\text{g}$  of SCB-2019 + Alum, 9  $\mu\text{g}$  of SCB-2019 + Alum + CpG, 30  $\mu\text{g}$  of SCB-2019 + Alum + CpG, and ChAdOx-1, respectively (see methods). a.u.: arbitrary unit.

## Supplementary Figure 4

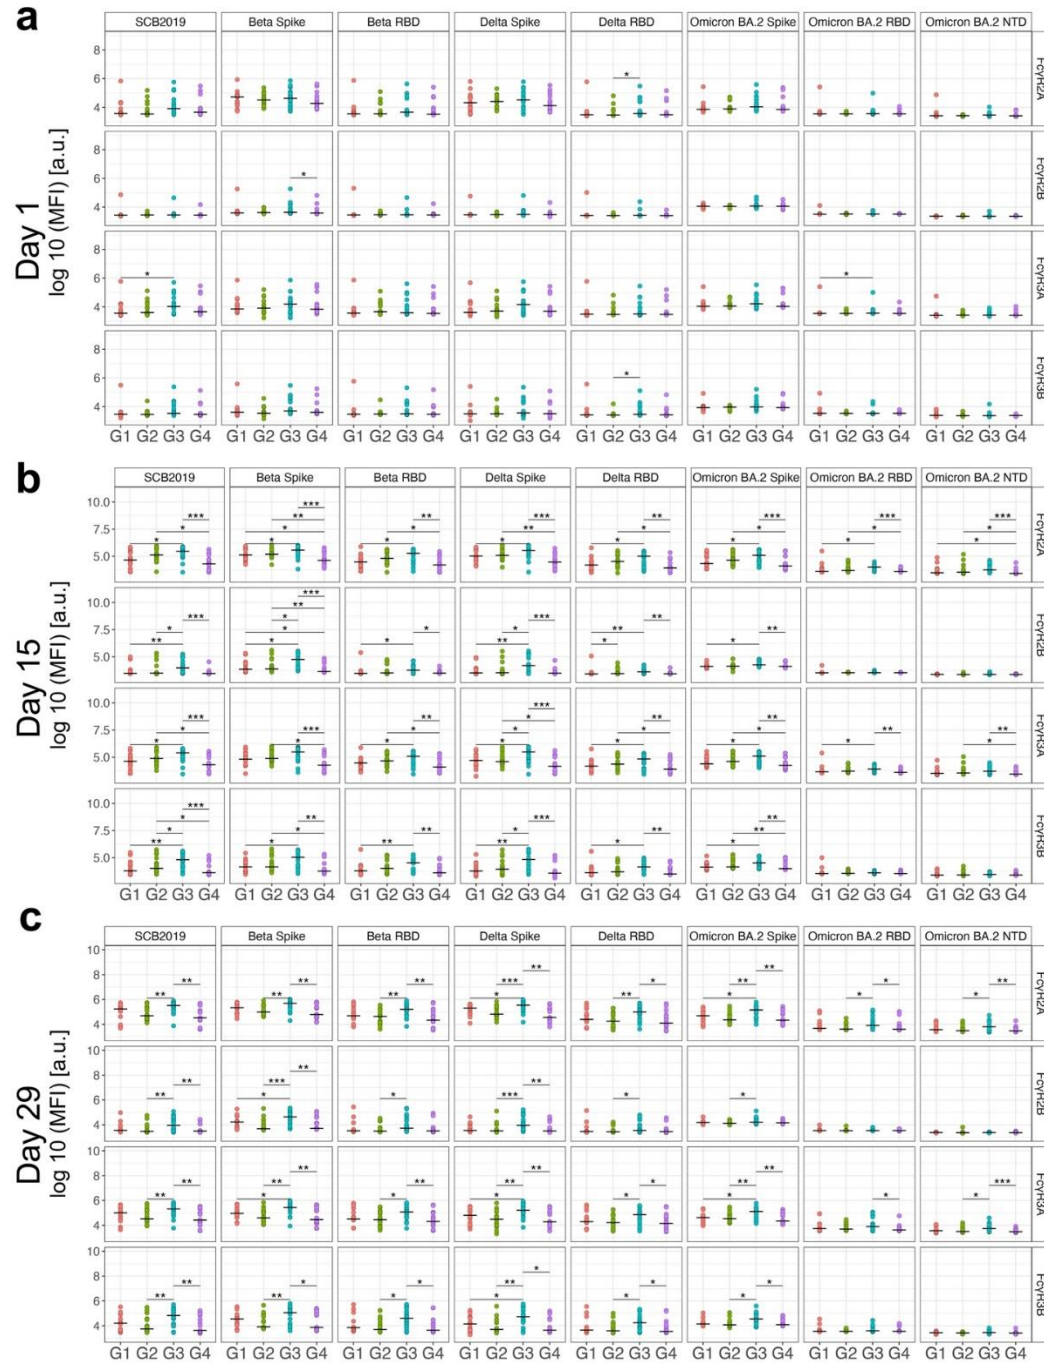

**Supplementary Figure 4. Univariate differences in Fc $\gamma$ R binding antibody titers among treatment groups for VOC Spikes, subdomains, and SCB-2019.** (a) Baseline Fc $\gamma$ R binding profiles against the indicated antigen of Groups 1, 2, 3, and 4. Shown on the y-axis is the binding mean fluorescence intensity (MFI) in log base 10 of the indicated Fc $\gamma$ R. (b) Same as (a), but for Fc $\gamma$ R binding profiles at Day 15. (c) Same as (a), but for Fc $\gamma$ R binding profiles at Day 29. \*  $p < 0.05$ , \*\*  $p < 0.01$  \*\*\* $p < 0.001$  before multiple test correction (Wilcoxon rank-sum test). Groups 1, 2, 3, and 4 refer to treatment arms of 9  $\mu$ g of SCB-2019 + Alum, 9  $\mu$ g of SCB-2019 + Alum + CpG, 30  $\mu$ g of SCB-2019 + Alum + CpG, and ChAdOx-1, respectively (see methods). a.u.: arbitrary unit.

## Supplementary Figure 5

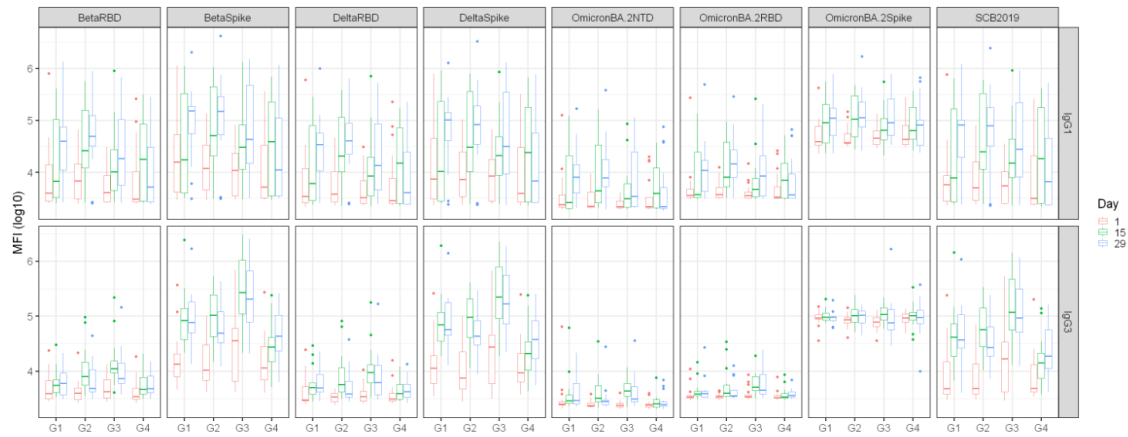

**Supplementary Figure 5. Peak response of IgG1 and IgG3 titer across multiple VOCs.** Boxplots of log<sub>10</sub> mean fluorescence intensity (MFI) measurements for IgG1 and IgG3 antibody specificity across Beta, Delta, Omicron BA.2, and SCB-2019 antigens. Groups 1-4 refer to treatment arms of 9  $\mu$ g of SCB2019 + Alum, 9  $\mu$ g of SCB2019 + Alum + CpG, 30  $\mu$ g of SCB2019 + Alum + CpG, and ChAdOx-1, respectively.

## Supplementary Figure 6

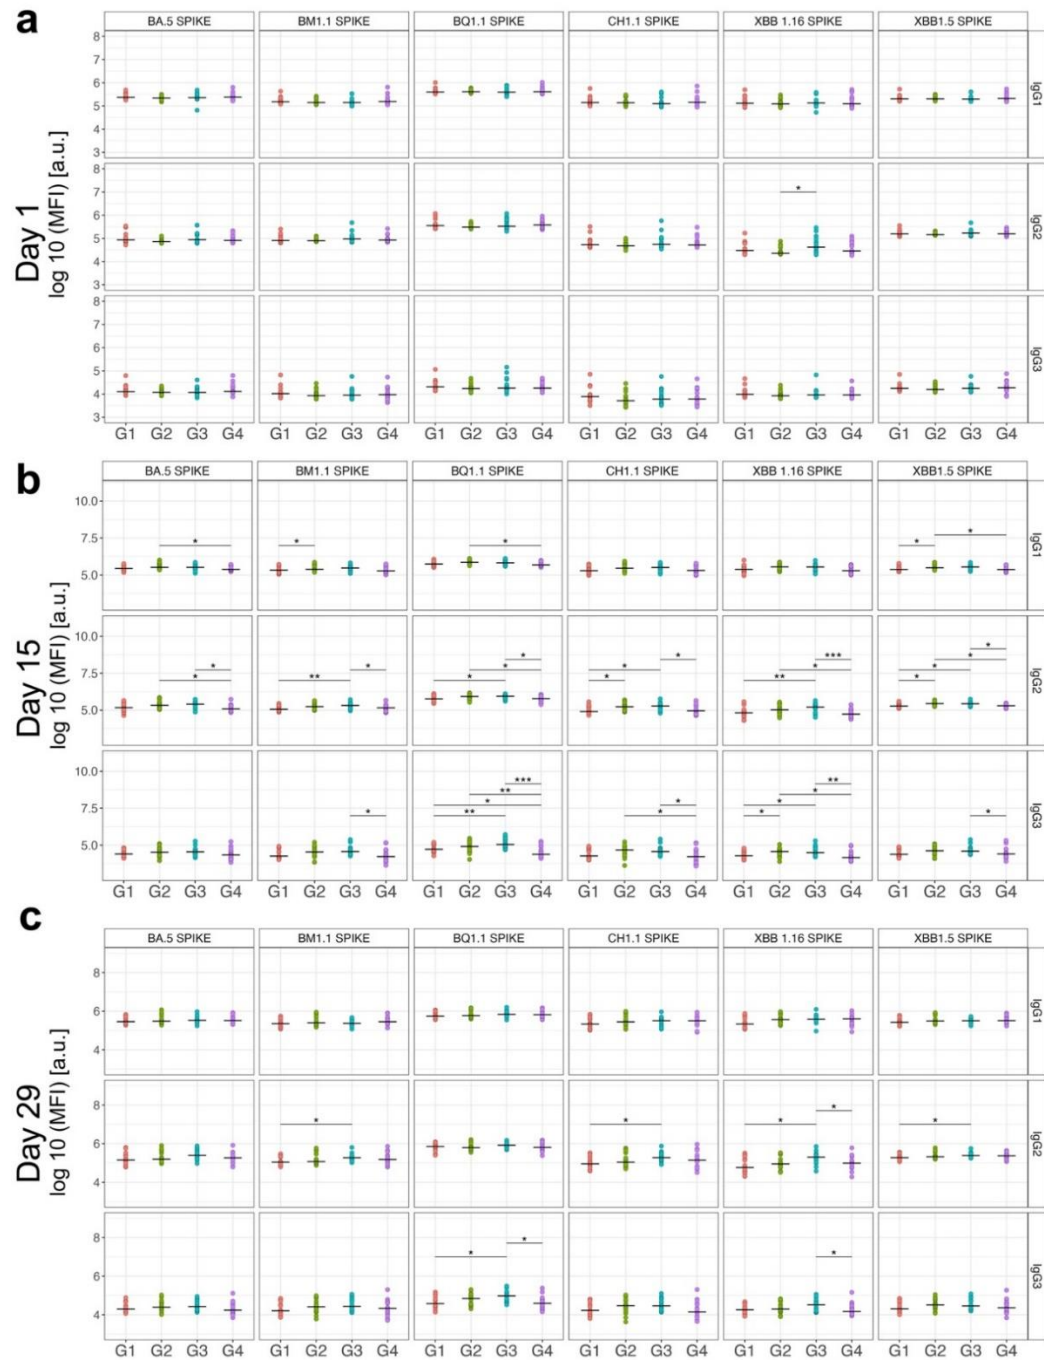

**Supplementary Figure 6. Univariate differences in antibody binding titers among treatment groups for Omicron-lineage Spikes.** (a) Baseline antibody binding profiles against the indicated antigen of Groups 1, 2, 3, and 4. Shown on the y-axis is the binding mean fluorescence intensity (MFI) in log base 10 of the indicated antibody isotype or subclass. (b) Same as (a), but for antibody binding profiles at Day 15. (c) Same as (a), but for antibody binding profiles at Day 29. \*  $p < 0.05$ , \*\*  $p < 0.01$  \*\*\* $p < 0.001$  before multiple test correction (Wilcoxon rank-sum test). Groups 1, 2, 3, and 4 refer to treatment arms of 9  $\mu\text{g}$  of SCB-2019 + Alum, 9  $\mu\text{g}$  of SCB-2019 + Alum + CpG, 30  $\mu\text{g}$  of SCB-2019 + Alum + CpG, and ChAdOx-1, respectively (see methods). a.u.: arbitrary unit.



## Supplementary Figure 7

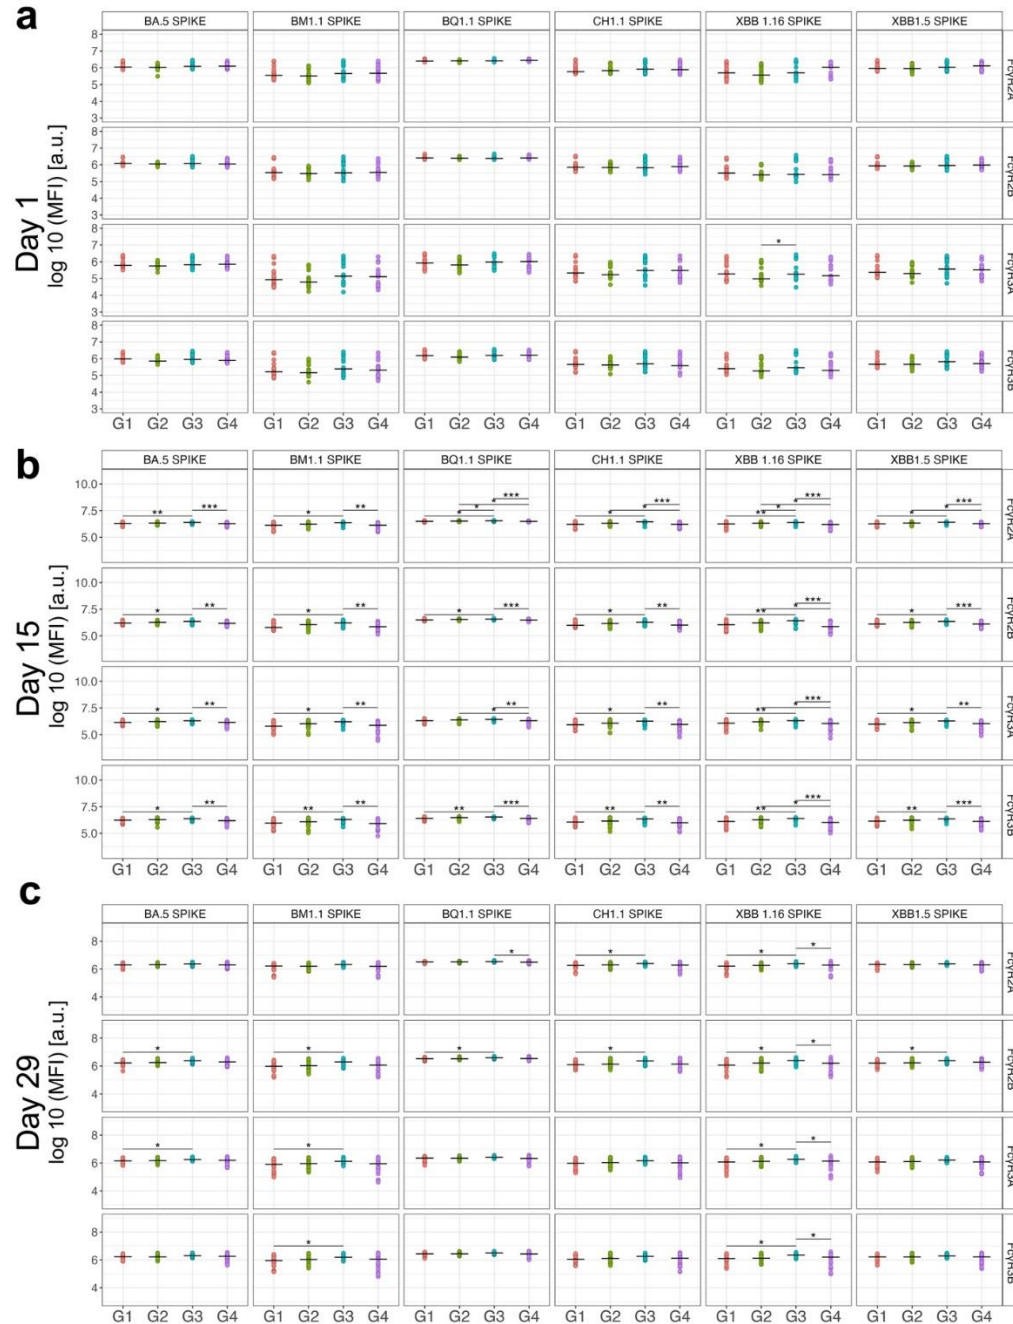

**Supplementary Figure 7. Univariate differences in Fc $\gamma$ R binding antibody titers among treatment groups for Omicron-lineage Spikes.** (a) Baseline Fc $\gamma$ R binding profiles against the indicated antigen of Groups 1, 2, 3, and 4. Shown on the y-axis is the binding mean fluorescence intensity (MFI) in log base 10 of the indicated Fc $\gamma$ R. (b) Same as (a), but for Fc $\gamma$ R binding profiles at Day 15. (c) Same as (a), but for Fc $\gamma$ R binding profiles at Day 29. \*  $p < 0.05$ , \*\*  $p < 0.01$ , \*\*\*  $p < 0.001$  before multiple test correction (Wilcoxon rank-sum test). Groups 1, 2, 3, and 4 refer to treatment arms of 9  $\mu\text{g}$  of SCB-2019 + Alum, 9  $\mu\text{g}$  of SCB-2019 + Alum + CpG, 30  $\mu\text{g}$  of SCB-2019 + Alum + CpG, and ChAdOx-1, respectively (see methods). a.u.: arbitrary unit.

Supplementary Figure 8

## Gating Strategy for Antigen Binding

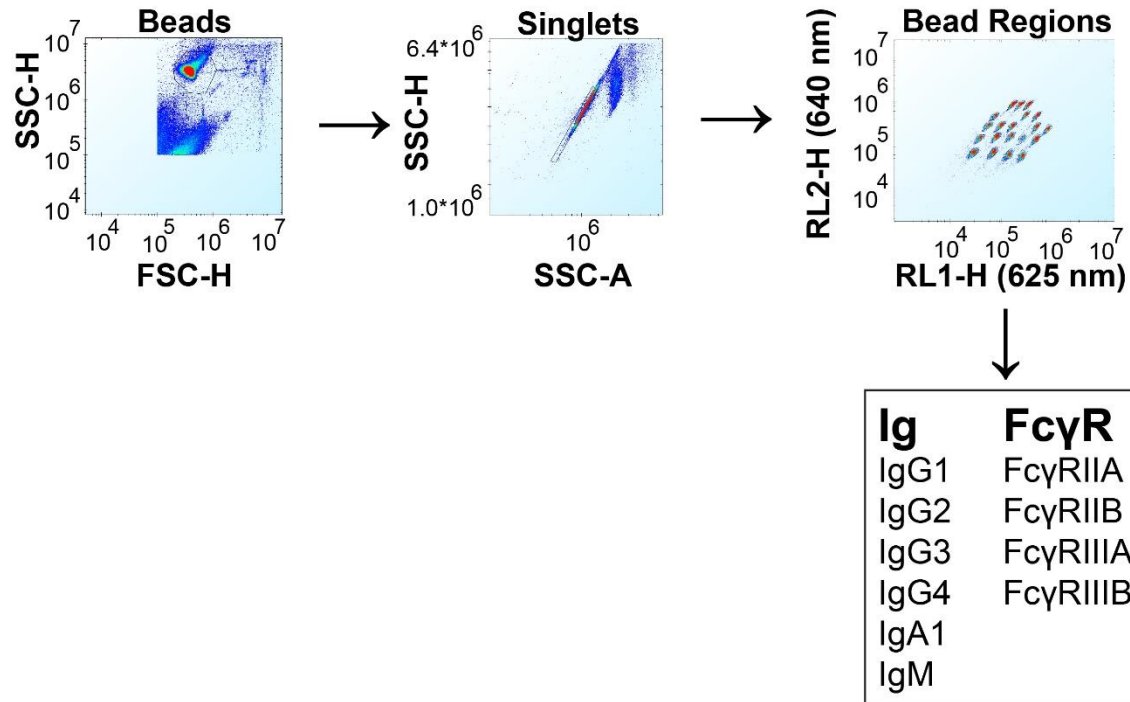

**Supplementary Figure 8. Gating strategy for antibody isotype and subclass, and Fc $\gamma$ R-binding antibodies.** Luminex beads were gated for singlets, and then identified by individual beads regions corresponding to a single antigen. Individual antibody isotypes and subclasses, and Fc $\gamma$ R-binding antibodies were quantified for binding to the antigen-coated beads.
